1     **Meta Analysis of the *Ralstonia solanacearum* species complex (RSSC)**  
2     **based on comparative evolutionary genomics and reverse ecology**

3     **Parul Sharma**<sup>1,2</sup> (ORCID: 0000-0002-3065-4377), **Marcela A. Johnson**<sup>1,2</sup>(ORCID: 0000-0002-8446-2493), **Reza**  
4     **Mazloom**<sup>3</sup> (0000-0002-5224-941X), **Caitilyn Allen**<sup>4</sup> (ORCID ID [0000-0001-5805-8000](#)), **Lenwood S. Heath**<sup>3</sup>(0000-0003-  
5     1608-431X), **Tiffany M. Lowe-Power**<sup>5\*</sup> (ORCID: 0000-0003-2681-3563), **Boris A. Vinatzer**<sup>1\*</sup>(0000-0003-4612-225X)

6     <sup>1</sup>School of Plant and Environmental Sciences, Virginia Tech, Blacksburg VA, USA

7     <sup>2</sup>Graduate Program in Genetics, Bioinformatics and Computational Biology, Virginia Tech,  
8     Blacksburg VA, USA

9     <sup>3</sup>Department of Computer Science, Virginia Tech, Blacksburg VA, USA

10    <sup>4</sup>Department of Plant Pathology, University of Wisconsin-Madison, Madison WI, USA

11    <sup>5</sup>Department of Plant Pathology, University of California Davis, Davis CA, USA

12    \* **Correspondence:**

13    Corresponding Authors

14    Boris A Vinatzer ([vinatzer@vt.edu](mailto:vinatzer@vt.edu)) and Tiffany Lowe-Power ([tlowepower@ucdavis.edu](mailto:tlowepower@ucdavis.edu))

15

16    **Keywords: Bacterial wilt, sequevar, species concepts, taxonomy, recombination, comparative**  
17    **genomics (Up to 6)**

18

19 **Abstract**

20 *Ralstonia solanacearum* species complex (RSSC) strains are bacteria that colonize plant xylem and  
21 cause vascular wilt diseases. However, individual strains vary in host range, optimal disease  
22 temperatures, and physiological traits. To increase our understanding of the evolution, diversity, and  
23 biology of the RSSC, we performed a meta-analysis of 100 representative RSSC genomes. These 100  
24 RSSC genomes contain 4,940 genes on average, and a pangenome analysis found that there are 3,262  
25 genes in the core genome (~60% of the mean RSSC genome) with 13,128 genes in the extensive  
26 flexible genome. Although a core genome phylogenetic tree and a genome similarity matrix aligned  
27 with the previously named species (*R. solanacearum*, *R. pseudosolanacearum*, *R. syzygii*) and  
28 phylotypes (I-IV), these analyses also highlighted an unrecognized sub-clade of phylotype II.  
29 Additionally, we identified differences between phylotypes with respect to gene content and  
30 recombination rate, and we delineated population clusters based on the extent of horizontal gene  
31 transfer. Multiple analyses indicate that phylotype II is the most diverse phylotype, and it may thus  
32 represent the ancestral group of the RSSC. Additionally, we also used our genome-based framework  
33 to test whether the RSSC sequence variant (sequevar) taxonomy is a robust method to define within-  
34 species relationships of strains. The sequevar taxonomy is based on alignments of a single conserved  
35 gene (*egl*). Although sequevars in phylotype II describe monophyletic groups, the sequevar system  
36 breaks down in the highly recombinogenic phylotype I, which highlights the need for an improved  
37 cost-effective method for genotyping strains in phylotype I. Finally, we enabled quick and precise  
38 genome-based identification of newly sequenced *Ralstonia* strains by assigning Life Identification  
39 Numbers (LINs) to the 100 strains and by circumscribing the RSSC and its sub-groups in the  
40 LINbase Web service.

41

42        **IMPACT STATEMENT**

43        The *Ralstonia solanacearum* species complex (RSSC) includes dozens of economically important  
44        pathogens of many cultivated and wild plants. The extensive genetic and phenotypic diversity that  
45        exists within the RSSC has made it challenging to subdivide this group into meaningful subgroups with  
46        relevance to plant disease control and plant biosecurity. This study provides a solid genome-based  
47        framework for improved classification and identification of the RSSC by analyzing one hundred  
48        representative RSSC genome sequences with a suite of comparative evolutionary genomic tools. The  
49        results also lay the foundation for additional in-depth studies to gain further insights into evolution and  
50        biology of this heterogeneous complex of destructive plant pathogens.

51

52        **DATA SUMMARY**

53        The authors confirm that all raw data and code and protocols have been provided within the  
54        manuscript. All publicly available sequencing data used for analysis have been supplemented with  
55        accession numbers to access the data. The assembled genome of strain 19-3PR\_UW348 was  
56        submitted to NCBI under Bioproject PRJNA775652 Biosample SAMN22612291. This Whole  
57        Genome Shotgun project has been deposited at GenBank under the accession JAJMMU000000000.  
58        The version described in this paper is version JAJMMU010000000.

59

60

61

62

## 63 1 INTRODUCTION

64 Named species generally correspond to groups of bacteria with pairwise genome similarity over a  
65 95% average nucleotide identity (ANI) threshold and that also share a core set of phenotypes [1].  
66 Bacterial plant pathogens rarely conform to this description. In contrast, many plant pathogenic  
67 bacteria belong to species complexes whose members share phenotypes but have pairwise ANI  
68 values below 95%. Further, one of the phenotypes that plant pathologists care most about, host range,  
69 varies widely among members of the same plant pathogen species.

70 The bacterial wilt pathogens in the *Ralstonia solanacearum* species complex (RSSC) are a notable  
71 example and the objects of this study. RSSC pathogens share a specialized habitat, the water-  
72 transporting xylem vessels and stem apoplasts of angiosperm plants, as well as a common pathology,  
73 lethal wilt symptoms [2]. Nonetheless, pairwise ANI of RSSC strains can be as low as 90.7%, and  
74 host ranges can vary dramatically between closely related strains that have pairwise ANI over 95%  
75 [3]. At the same time, many phylogenetically distant strains, with pairwise ANI below 95%, share  
76 host ranges [3, 4].

77 Genomic analyses place RSSC strains into four statistically supported phylogenetic clades that each  
78 share ANI values above 95% and correspond to geographic regions where the clades diversified [5].  
79 These clades are known as phylotypes I, II, III, and IV with geographic origins in Asia, the Americas,  
80 Africa, and the Indonesian archipelago/Japan, respectively. Phylotype II can be further subdivided  
81 into IIA and IIB corresponding to two sub-clades [6]. Taxonomists formally divided the species  
82 complex into three species: *R. solanacearum*, corresponding to phylotype II; *R.*  
83 *pseudosolanacearum*, corresponding to both phylotypes I and III; and *R. syzygii*, corresponding to  
84 phylotype IV [7] (Figure 1).

85 Describing the RSSC phylotypes as three named species conforms to taxonomic practice since RSSC  
86 clades are separated by genomic metrics and a few physiological traits correlate with the clades [5].  
87 On the other hand, one could argue that there are not consistent differences in relevant pathogen  
88 behavior and ecology between clades to justify their division into separate species. Moreover, re-  
89 classification using new names leads to inconsistent naming of strains in the literature and in  
90 databases. The resulting confusion can interfere with one of the main goals of taxonomy: clear  
91 communication about organisms.

92 There is no simple resolution to this conflict. There are almost as many opinions about what a  
93 bacterial species is, and if bacterial species even exist, as there are taxonomists [8]. However, in  
94 today's taxonomic practice, a pragmatic species "definition" is used. Bacterial species are commonly  
95 defined as groups of bacteria that have over 95% ANI to the name-bearing type strain of one species,  
96 have below 95% ANI to type strains of all other named species, and share a set of measurable  
97 phenotypes that distinguish them from members of other named species [1, 9]. Fortunately, genome  
98 sequence analysis now allows us to go far beyond ANI to infer many characteristics of groups of  
99 bacteria and to circumscribe bacterial species using a variety of species concepts, including the  
100 evolutionary, the ecological, and the pseudo-biological species concepts.

101 The evolutionary species concept considers species as independently evolving units [10]. Therefore,  
102 the investigation of evolutionary relationships or phylogenetics is the main approach for describing  
103 species based on this concept. The economic and technological accessibility of genome sequencing  
104 has allowed scientists to replace older approaches, such as DNA-DNA hybridization and 16S rRNA  
105 sequencing, with phylogenetic reconstructions based on whole genomes. Yet, even using all genes  
106 shared by a group of organisms may not precisely reflect their complete evolutionary relationships  
107 because of horizontal genetic exchange between sub-lineages [11]. However, it is hard to argue that  
108 there is anything that comes closer to representing evolutionary relationships than building a

109 phylogenetic tree based on all gene sequences shared by the genomes under investigation, in other  
110 words, building a core genome phylogeny.

111 In a herculean effort, the genome taxonomy database (GTDB) team has built a phylogeny using  
112 protein sequences corresponding approximately to the core genome of all genome-sequenced  
113 prokaryotes [12, 13]. This effort has helped correct incongruencies in the taxonomic lineages of  
114 validly published species descriptions, which are often based on single gene 16S rRNA sequences.  
115 The names and lineages of these species descriptions can be found in the official List of Prokaryotic  
116 Names with Standing in Nomenclature (LPSN), which are reflected in large part by NCBI taxIDs  
117 [14]. Each time GTDB finds a genome that does not belong to a named species because it has a lower  
118 than 95% ANI to the type strain of a species, it creates a new species cluster with a placeholder name,  
119 e.g.: *Escherichia coli*\_A. With respect to the RSSC, the GTDB changed a higher rank of the RSSC  
120 taxonomy: based on evolutionary distances inferred from genome sequences, the GTDB demoted the  
121 Betaproteobacteria to a subgroup nested within the class of the Gammaproteobacteria [13] (Figure 1).  
122 This shift in RSSC taxonomy was adopted by the microbial community profiling database SILVA  
123 with release 138 [15]. Importantly, GTDB does not resolve evolutionary relationships beyond the  
124 95% ANI threshold (*i.e.*, within species) since its goal is to improve “traditional” taxonomy based on  
125 the established ranks from kingdom to species and not to resolve evolutionary relationships within  
126 species.

127 The sequevar system was developed as a phylogeny-based taxonomy for within-species classification  
128 of the RSSC. This system coarsely estimates phylogenetic relationships of strains based on a multiple  
129 sequence alignment of a single DNA marker (a 750 bp region of the *egl* endoglucanase gene). Strains  
130 with similar sequences are assigned to sequence variant groups (sequevars) [16]. This can be  
131 considered a taxonomy focused on the “Evolutionary within-species concept”, with the expectation  
132 that some of the predicted relationships are inaccurate due to horizontal gene transfer (HGT). As the

133 plant pathology community transitions from population genetics to population genomics, the ability  
134 of the sequevar system to estimate within-species phylogeny can be validated, which is one goal of  
135 this paper.

136 The ecological species concept defines a species as a group of bacteria that adapted to the same  
137 ecological niche [17]. Genomic comparisons can also provide insight into ecological species since  
138 bacterial adaptation necessarily involves a combination of gene gain/loss and allelic differentiation of  
139 gene sequences. For example, a pangenome analysis identifies gene families that are present or  
140 absent in different sets of genomes. These genome sets may represent groups that have adapted to  
141 different ecological niches and may thus represent different ecological species. Recently, the novel  
142 reverse ecology approach has gained traction [18]. This approach aims to identify populations that  
143 are in the process of adapting to an ecological niche based on frequent exchange of advantageous  
144 mutations during selective sweeps [19]. Putting this concept into practice, Arevalo and colleagues  
145 developed a tool, PopCOGenT, that assigns bacteria to distinct populations by identifying recent  
146 recombination events within sets of genomes and cessations of recombination between other sets of  
147 genomes [20]. Since the reverse ecology approach defines populations based on gene exchange, it  
148 also relates to the pseudo-biological species concept [21], which connects bacteria to the biological  
149 species concept, usually used for sexually reproducing eukaryotes. In the pseudo-biological species  
150 concept, gene exchange by homologous recombination during sexual crosses is replaced with gene  
151 exchange by HGT [22]. For example, the *Pseudomonas syringae* species complex has been proposed  
152 to represent a single species because HGT of virulence genes has been found to occur across the  
153 entire complex [23].

154 Because plant pathogenic bacteria with pairwise ANI values above 95% can have starkly distinct host  
155 ranges, plant pathologists have developed *ad hoc* within-species classification systems. In most  
156 pathogen groups, the “pathovar” concept is used to describe sub-species groups that cause the same

157 disease on the same range of host plant species [24]. The “race” system is often used to describe  
158 strains within a pathovar that cause disease on different crop genotypes within the same species (for  
159 example in *Pseudomonas syringae* pv. *phaseolicola* [25]). The RSSC was never divided into  
160 pathovars, but for many years the term race was used in an attempt to divide strains by host range at  
161 the plant species level. This was never practically useful and eventually the RSSC race system broke  
162 down for two reasons. First, RFLP and sequence data revealed the “races” did not correspond to  
163 phylogenetic divisions [3, 26]. Second, most RSSC strains have very broad host ranges; it is not  
164 unusual for one strain to be able to cause disease on monocot and dicot hosts (e.g. banana and tomato  
165 [27] or potato and ginger [28] ). As a result, most strains end up in a single unhelpful “Race 1” bin  
166 that includes members of all four phylotypes described above. In parallel, the RSSC was also  
167 subclassified into biovars based on *in vitro* physiological tests [29]. Once again, these biovars did not  
168 correspond to phylogenetic subgroups.

169 To alleviate the problem with the many different opinions about what should be considered a species,  
170 the confusion due to recurrent reclassification, and the various within-species classification schemes  
171 that are hard to use for non-specialists, we have developed a stable and neutral genome-based  
172 framework to circumscribe any of the above groups and to easily translate from one classification  
173 system to another. This system is based on genome similarity-based codes, called Life Identification  
174 Numbers (LINs) [30]. LINs consist of a series of positions with each position representing a different  
175 ANI threshold. ANI thresholds increase moving from the left to the right of a LIN. Therefore,  
176 bacteria with very low pairwise ANI do not share any LIN position (below 70% ANI). Bacteria with  
177 intermediate ANI (e.g. 95%), have identical LINs to an intermediate position (e.g., position F).  
178 Nearly identical bacteria (e.g., 99.99% ANI) have LINs that are identical up to, but not including, the  
179 rightmost LIN positions (e.g., position R or S). Therefore, LINs can precisely circumscribe any  
180 bacterial group with pairwise ANI values from 70% ANI, corresponding approximately to families



181 and genera, to around 99.99%, corresponding approximately to clonal lineages. LINs have been  
182 implemented for numerous microbial genomes, including the representative genomes of GTDB, in  
183 the LINbase Web server [31].

184 The goal of this paper is to investigate RSSC classification through the lens of the different species  
185 concepts and within-species concepts by applying comparative evolutionary genomics and a reverse  
186 ecological approach to a set of representative, publicly available RSSC genomes. To translate this  
187 meta-analysis into applied utility, we then circumscribed the identified groups in the LINbase Web  
188 server, so that users can easily identify any new isolate based on its sequenced genome as a member  
189 of a named species, phylotype, population, or any other group within the RSSC.

## 190 **2 MATERIALS AND METHODS**

### 191 **2.1 Selection of representative genomes**

192 All publicly available genomes belonging to the three species (*Ralstonia solanacearum*, *Ralstonia*  
193 *pseudosolanacearum* and *Ralstonia syzygii*) were downloaded from the Assembly database of NCBI  
194 on September 5, 2020. Assembled genomes of strain *Ralstonia syzygii* R24 and Blood Disease  
195 Bacterium R229 were downloaded from the Microscope Microbial Genome Annotation and Analysis  
196 Platform - MaGe [32]. The genome of strain 19-3PR\_UW348 was sequenced using the Pacbio  
197 Sequel II sequencing platform and assembled using Canu (version 2.0) [33]. It is included here as  
198 well (NCBI accession number JAJMMU000000000). All genome assemblies were assessed for  
199 quality using the CheckM (version 1.0.13) tool [34]. Genomes with completeness over 98%,  
200 contamination below 6%, number of contigs below 670, and N50 scores above 20,000 were retained.  
201 This genome set was further reduced by removing almost identical genomes to obtain a more even  
202 representation of the currently known genomic diversity of the RSSC. This was done using the  
203 LINflow tool (version 1.1.0.3) [35], retaining only one genome for each group of genomes that had

204 reciprocal ANI values of over 99.975%. Preference was given to genomes of higher sequence quality  
205 and for which more published biological data were available.

## 206 **2.2 Pangenome analysis and construction of the core-genome phylogenetic tree**

207 The selected RSSC genomes were subjected to a pangenome analysis using PIRATE (version 1.0.4)  
208 [36]. To prepare the genome sequences for input to PIRATE, genomes were annotated using the  
209 PROKKA gene annotation tool (version 1.14.6) [37] with default settings. The annotated files were  
210 then used to obtain a core gene alignment whereby all genes present in at least 98% of the genomes  
211 were considered as core genes. The following parameters were used: `-a` to obtain a multiFASTA  
212 core gene alignment file as output and `-k` for faster homology searching with the `--diamond`  
213 option specified. The final core gene alignment file was used as input for IQtree (version 2.0.3) [38]  
214 using automated model selection to obtain a maximum-likelihood phylogenetic tree. The final  
215 phylogenetic tree was visualized using the `ggtree` [39] package in R. For the pangenome analysis, the  
216 PIRATE output file with all gene families was used to obtain the differences in gene content between  
217 different phylotypes. For phylotypes I and II, a gene was considered as a core phylotype gene if it  
218 was present in more than 95% of the genomes in a phylotype. Because of the much smaller number  
219 of genomes in phylotypes III and IV, presence in all but one genome was used as a rule. A score of 1  
220 was assigned in case of gene presence and a score of 0 for gene absence. This assessment was  
221 performed for each gene in the pangenome for all 4 phylotypes (I,II,III,IV), resulting in a presence-  
222 absence matrix with genes as rows and phylotypes as columns (Supplementary Table 2). The matrix  
223 was then visualized through an upset analysis using the `UpSetR` [40] package in R.

## 224 **2.3 ANI analysis**

225 Pairwise average nucleotide identity (ANI) was measured for all representative genomes using pyani  
226 (version 0.2.10) [41] with default settings. The resulting matrix was used to construct a heatmap of  
227 ANI values using the function `heatmap.2` under the `gplots` package [42] in R.

## 228 **2.4 Recombination analysis**

229 First, a recombination analysis of the RSSC was performed within the core genome. The core gene  
230 alignment and the phylogenetic tree obtained in the pangenome analysis were used as input to  
231 `ClonalframeML` (version 1.12) [43] with default parameters. The inferred recombination regions  
232 were used in two different analyses: (1) to find the genes in these regions using `SAMtools` (version  
233 1.12) [44] with the command `intersect`; and (2) to build a recombination-free phylogenetic tree  
234 by masking the recombination regions using `cfml-maskrc` [45] and using the new recombination-free  
235 alignment as input to `raxml-ng` (version 1.0.3) [46] with the following parameters `--all --`  
236 `model GTR+G --bs-trees 1000`. The tree was visualized using the `ggtree` [39] package in R.

237 Next, a recombination analysis was performed separately for each phylotype including the entire  
238 genome. For each phylotype, three different reference genomes (four for phylotype II; Table S3) were  
239 picked based on the CheckM results. The corresponding genomes were used as input to `snippy` (version  
240 4.6.0) [47] to generate a whole genome SNP alignment mapped to each of the different reference  
241 genomes separately. The whole genome SNP alignment was used as input to `gubbins` (version 3.0.0)  
242 [48] to obtain the regions under recombination for each phylotype. The `SAMtools intersect` [44]  
243 function was used to find the genes in these regions.

## 244 **2.5 Reverse ecology analysis**

245 To obtain population predictions, inferred from the pairwise measurement of HGT, all of the  
246 representative genomes were used as input to PopCOGent (downloaded from  
247 <https://github.com/philarevalo/PopCOGent> on March, 2021 [20].

## 248 **2.6 Sequevar analysis**

249 Automated sequevar assignments were generated using a custom bash script that takes a query  
250 genome sequence and compares it to a database of *egl* gene sequences (compiled by E. Wicker,  
251 CIRAD, France [49] using the command line version of Basic Local Alignment Search Tool: BLAST  
252 (version 2.9.0+) [50]. Sequevar assignment was made based on the best hit with 99-100% alignment,  
253 and results were cross-checked with data from the literature when available.

## 254 **2.7 LIN assignment and LINgroup circumscriptions**

255 All representative genomes and their metadata were uploaded into LINbase [31] for automated LIN  
256 assignment. LINgroups corresponding to groups identified here were circumscribed including a  
257 name, a description, and a link to this manuscript.

# 258 **3 RESULTS and DISCUSSION**

## 259 **3.1 A core-genome phylogeny to determine evolutionary relationships**

260 To classify the RSSC based on the evolutionary, ecological, and pseudo-biological species concepts,  
261 we needed to identify high quality genome sequences that best represent the described genetic  
262 diversity. We started with 167 publicly available genome sequences (Supplementary Table S1), from  
263 which we removed eleven low quality genomes that were fragmented into many contigs, had low  
264 genome completeness scores, had high contamination scores, or had a high number of ambiguous  
265 bases. From the remaining 156 genomes, we selected 100 genomes (Figure 2) best representing the

266 known diversity of the species complex and limiting redundancy due to several nearly identical  
267 genomes present in the original set.

268 To uncover the phylogenetic relationships among the representative strains, we performed a  
269 pangenome analysis. This analysis revealed that 3,262 orthologous genes constitute the RSSC core  
270 genome (Table S2). A phylogenetic tree based on these core genes (Figure 2) clustered strains into  
271 clades corresponding to the four known phylotypes, with 59 strains belonging to phylotype I, 28  
272 strains belonging to phylotype II (among which 9 and 16 strains belonged to phylotypes IIA and IIB,  
273 respectively, and 3 strains were intermediate between IIA and IIB), 5 strains belonging to phylotype  
274 III, and 8 strains belonging to phylotype IV. During this analysis, we identified one genome sequence  
275 that may be the result of a chimeric assembly between a phylotype I strain and a phylotype II strain:  
276 CRMRs218. This genome was published as a phylotype I strain [51], but in the core genome tree it  
277 formed a singleton branch basal to all phylotype II strains. Because of this ambiguity, the strain was  
278 excluded from further analysis.

279 Based on the geographic origin of strains, the phylogenetic tree is consistent with the hypothesis that  
280 the phylotypes diversified in different global regions [4, 52]. In fact, most phylotype I strains were  
281 isolated in continental Asia, phylotype II strains in the Americas, phylotype III strains in Africa, and  
282 phylotype IV strains in Indonesia and Pacific Islands (Figure 2). It is important to point out that the  
283 strains used here are not equally distributed between and within continents and thus neither are  
284 phylotypes. For example, strains belonging to phylotype III isolated in Africa are underrepresented  
285 (5% of total strains) compared to other phylotypes. East Asian strains represent 90% of the analyzed  
286 phylotype I strains, with most sequenced strains isolated in either South Korea or China. Although  
287 phylotype I is common in South Asia, only 1.7% of the sequenced phylotype I strains were isolated  
288 in South Asia. This uneven representation most likely reflects a bias in publicly available genome

289 sequences from different geographic regions and is not a reflection of the actual geographic  
290 distribution and diversity of RSSC strains.

291 The phylotype II circumscription was consistent with the classification of strains based on the LPSN  
292 and GTDB classification systems of belonging to the named species *R. solanacearum*. Similarly, all  
293 phylotype I and III strains were consistent with the LPSN and GTDB classification of belonging to  
294 the recently named species *R. pseudosolanacearum* [7]. Phylotype IV strains correspond to *R. syzygii*  
295 as per LPSN taxonomy and “*R. solanacearum\_A*” as per GTDB. It is important to note that many  
296 strains that are members of *R. syzygii* and *R. pseudosolanacearum* are listed as *R. solanacearum* in  
297 NCBI, because the genomes were submitted before the reclassification and adoption of the new  
298 species names by the scientific community.

### 299 **3.2. Pangenome analyses provide a basis to investigate adaptation to ecological niches**

300 One of the currently unanswered questions about the RSSC is to which degree the four phylotypes  
301 diverged from each other because of adaptation to different niches or because of allopatry. As a small  
302 step towards answering this question, we determined the congruences and differences in gene content  
303 between and within phylotypes.

304 Overall, the RSSC contained a total of 13,128 gene families, which represent the RSSC pangenome.  
305 The respective pangenome sizes of the individual phylotypes are: 4,023 (I), 3,329 (II), 3,909 (III),  
306 3,971 (IV). An Upset plot was used to visualize the number of genes that are either shared by all  
307 strains of one phylotype and absent from all other phylotypes, *i.e.*, the phylotype-specific core genes,  
308 or that are shared between subsets of phylotypes (Figure 3). Due to the above mentioned differences  
309 in the extent to which the genomic diversity within each phylotypes was sampled, it is difficult to  
310 make firm conclusions. Nonetheless, based on the available data, the core genome of phylotype II  
311 (3,329 genes) was considerably smaller than that of the other phylotypes (3,909-4,023 genes).

312 At the species level, *R. solanacearum* (phylotype II) has a core genome size (3,329 genes) very  
313 similar to the core genome size of *R. pseudosolanacearum* (phylotype I and III) (3,408). A surprising  
314 finding is the large core genome size of the *R. syzygii* species, which includes strains that cause the  
315 most phenotypically diverse diseases (Sumatra disease of cloves, banana blood disease, and classical  
316 bacterial wilts) [55]. However, the large size of the *R. syzygii* / phylotype IV core genome (3,971)  
317 may be an artefact due to the small number of phylotype IV genomes available.

318 When comparing gene content between phylotypes, phylotypes I and III share the most core genes  
319 with each other that are not core genes of the other phylotypes (221 genes). This is consistent with  
320 the shared membership of phylotypes I and III in the *R. pseudosolanacearum* species. Phylotypes I,  
321 III, and IV constitute the group of phylotypes that have the most genes in common that are absent  
322 from the core genome of the remaining phylotype, *i.e.*, phylotype II in this case (403 genes). This is  
323 consistent with phylotype II having the smallest core genome and being the most diverse phylotype  
324 in regard to gene content.

### 325 **3.3 ANI analysis confirms species boundaries and genome similarity-based clusters**

326 After determining phylogenetic relationships and comparing gene content between strains providing  
327 the basis for investigating the RSSC from an evolutionary and ecological perspective, we calculated  
328 pairwise ANI between all 100 genomes (Figure 4 and Table S3). Since ANI is based on the average  
329 genetic distance of all DNA sequences shared between pairs of strains, it provides an orthogonal  
330 measure of genomic relationships beyond a core genome tree, which is limited to the genes shared by  
331 all 100 strains. In agreement with the core genome analysis, pairwise ANI clustered the genomes into  
332 the four phylotypes. Importantly, although phylotypes I and III formed distinct clusters, all strains in  
333 these two phylotypes had pairwise ANI values above 95%, which is consistent with these phylotypes  
334 being part of the same species.

335 Phylotype I strains had higher average pairwise ANI (99.35%) than other phylotypes (97.73% for  
336 phylotype II, 97.30% for phylotype III, and 98.67% for phylotype IV). Phylotype I appears to be the  
337 most genetically homogenous phylotype, but, as pointed out above, the genomic similarity could be  
338 an artefact stemming from the limited geographic distribution of most phylotype I genomes. If the  
339 high ANI among phylotype I strains is maintained as South Asian strains are sequenced, this may  
340 indicate that phylotype I emerged more recently in evolutionary time, possibly from within the wider  
341 genetic diversity of phylotype III.

342 Strains within phylotype II are characterized by relatively low ANI. Pairwise ANI indicates that there  
343 are three main subgroups. Strains in the sequevar 7 clade (K60, UW700, P822) had high pairwise  
344 ANI with each other (mean ANI 99.73%) and lower ANI with IIA and IIB strains (mean ANI  
345 97.53% and 96.18%, respectively), which is consistent with sequevar 7 strains clustering as a  
346 phylotype separate from phylotypes IIA and IIB.

#### 347 **3.4 Recombination analyses provide a basis to identify biological and ecological species**

348 Most RSSC strains are naturally transformable [56], and prior population genetics and genomics  
349 studies at the global, regional, and field scales have indicated that RSSC genomes are highly  
350 recombinogenic [52, 57–59]. To investigate whether the core genome phylogenetic tree was biased  
351 by recombination within the RSSC, we used ClonalFrameML to identify core genes that lack  
352 evidence of recombination. ClonalFrameML found recombination regions in 1,559 core genes (Table  
353 S4). The recombination regions detected by ClonalFrameML were masked and a recombination-free  
354 tree is shown in Figure 5B. While this tree maintained the main clades from the core genome tree  
355 shown in Figure 2 and 5A, the Southeast US clade (sequevar 7) shifted and became basal to  
356 phylotype IIA. This suggests that this clade's basal-to-phylotype-IIB position in the core genome tree



357 (Figure 2) could be due to recombination between its members and phylotype IIB strains rather than  
358 reflecting vertical inheritance.

359 Strains that have exchanged genes in recent history may belong to populations in the process of  
360 speciation, based on the ecological and biological species concepts. To determine which genomes  
361 belong to the same population based on recombination events in their entire genomes, we used  
362 PopCOGenT [20]. The population membership (“Pop Clusters”) of each genome is aligned to the  
363 core genome tree (Figure 5A). Most populations clustered phylogenetically related strains (18/20  
364 PopClusters). In three cases, individual strains formed populations that only contain themselves  
365 (Phyl. III strain CMR15 in PopCluster 10-0, Phyl. IV strain R24 in PopCluster 11-0, and Phyl. II  
366 strain SFC in PopCluster 12-0), indicating that they may be the only sequenced members of under-  
367 sampled populations. However, there were two PopCOGenT clusters that were polyphyletic:  
368 PopCluster 2-0 contained 8 IIB-4 strains and a IIA-57 strain IBSBF2570, while PopCluster 0-4  
369 contained 8 phylotype I strains from three distinct branches on the core genome tree.

370 Genes that are frequently transmitted horizontally between strains may play a role in adaptation (the  
371 ecological species concept). Therefore, in addition to PopCOGenT, we ran the independent  
372 recombination tool Gubbins [48] to detect recombination in the RSSC using 13 reference genomes (3  
373 genomes for phylotype I, III, and IV and 4 genomes for phylotype II). The results are summarized in  
374 Figure 6. Table S4 contains the estimated number of recombinations for each gene in the 13 reference  
375 genomes. As expected, mobile genetic elements (transposases, integrases, and phage associated  
376 proteins) were highly recombinogenic genes. Many of the highly recombining genes are type III  
377 secreted effectors, which RSSC strains use to manipulate plant host physiology and immunity. The  
378 high plasticity of type III effector repertoires is well known in RSSC strains [60]. Additionally,  
379 glycoside hydrolases, polygalacturonases, and endoglucanases displayed evidence of frequent  
380 recombination. Endoglucanases are involved in adaptation of *Xanthomonas* spp. to vascular vs.

381 apoplastic niches [61], but variation in plant cell wall degrading enzyme repertoires has not been  
382 investigated for RSSC. Several classes of genes involved in inter-microbial interactions were  
383 recombinogenic: non-ribosomal peptide synthetases and polyketide synthases [62], type VI secretion  
384 system genes like Vgr, PAAR, and putative effector/immunity pairs [63], and hemagglutinin-like  
385 proteins that are hypothesized to be contact-dependent inhibition (CDI) systems in RSSC [59].  
386 Investigating the functional diversity of the recombining genes may shed light on how interactions  
387 with plant hosts, microbial competitors, and novel abiotic environments shape the evolution of RSSC  
388 lineages.

### 389 **3.5 Speculation on the relative evolutionary ages of phylotypes**

390 Overall, our comparative genomics analyses suggest that either phylotype II (*R. solanacearum*) or  
391 phylotype IV is the most ancestral phylotype within the RSSC. Phylotype II genomes have the lowest  
392 average pairwise ANI value and phylotype II has the smallest core genome. Their lower  
393 recombination rate is also in line with higher sequence diversity since higher sequence diversity  
394 decreases the success of homologous recombination. All these results suggest that phylotype II is  
395 more diverse compared to the other phylotypes and, thus, could have emerged first. These findings  
396 are also consistent with an earlier study in which 29 RSSC genomes and 73 MALDI proteomes were  
397 compared [5]. Surprisingly though, phylotype IV is on the most basal branch in the core genome tree  
398 (Figure 2), as it was in a previous multi-locus sequence analysis tree [52]. This suggests that  
399 phylotype IV is the most ancestral phylotype. This inconsistency could be due to uneven sampling  
400 among phylotypes. The genomic diversity in phylotype IV may be under-sampled, and if additional  
401 genomes of diverse phylotype IV strains were to be sequenced, it might become more diverse than  
402 phylotype II. On the other hand, the basal position of phylotype IV might have been influenced by  
403 the choice of outgroup strains. If phylotype IV strains acquired genes from environmental *Ralstonia*  
404 closely related to the chosen outgroup strains, recombination could make phylotype IV seem more

405 closely related to the outgroup strains than they are by vertical inheritance. Therefore, we cannot  
406 firmly conclude which phylotype is most ancestral based on available data. On the other hand, there  
407 is one clear interpretation about relative ages of the phylotypes. Phylotype I is the least diverse  
408 phylotype that also branches off the latest as a lineage from phylotype III, making it likely the  
409 phylotype that most recently emerged and expanded.

### 410 **3.6 Comparing sequevars (*egl* trees) with the core genome phylogeny and populations**

411 The global plant pathology community has widely adopted the sequevar taxonomic system to classify  
412 *Ralstonia* strains at the within-species level. Over 5,000 strains from over 88 regions have been  
413 assigned to over 70 sequevar groups [64]. Because the sequevar system is based on a single genetic  
414 marker (750 bp of the *egl* gene), and RSSC genomes often recombine, we predicted that the *egl* gene  
415 may have recombined between strains. Indeed, *egl* recombination events were detected in 3 of 3  
416 phylotype I, 1 of 4 phylotype II, 1 of 3 phylotype III, and 3 of 3 phylotype IV reference genomes  
417 used in the Gubbins analysis (Fig 6D and Table S4). We and other plant pathologists have deposited  
418 over 4,500 “(*egl* gene, partial cds” sequences of RSSC isolates to the NCBI nucleotide database, but  
419 our results suggest that recombination of *egl* within the RSSC may limit the sequevar taxonomy’s  
420 ability to accurately estimate phylogenetic relationships.

421 With evidence that *egl* may be horizontally transmitted between RSSC strains, we investigated  
422 whether the sequevar system and trees constructed with *egl* sequences reflect phylogenetic  
423 relationships of strains. We extracted the partial *egl* nucleotide sequences from each of the 100 RSSC  
424 genomes and aligned them with reference sequences to assign sequevars to each genome (Table S1  
425 and Figure 5A). The sequevar assignments were monophyletic in the tested genomes for phylotype II  
426 (28 genomes assigned to 12 sequevars), III (5 genomes assigned to 4 sequevars), and IV (8 genomes  
427 assigned to 3 sequevars). Sequevar I-18 and sequevar I-13 mapped to single branches of the tree, so

428 these sequevars may be monophyletic. However, most of the phylotype I sequevars were highly  
429 polyphyletic. Five of the phylotype I sequevars (I-14, I-15, I-17, I-34, and I-45) were assigned to  
430 distinct branches within the phylotype I.

431 Overall, our results and prior work [57] indicate that the sequevar system is not informative for  
432 describing within-species relationships for phylotype I RSSC. The polyphyletic phylotype I  
433 sequevars are probably due to the inter-related phenomena of phylotype I's low genetic diversity and  
434 higher recombination. This suggests that improved methods for classifying within-species groups of  
435 phylotype I are needed, and PCR assays that target insertions/deletions might be a cost-effective  
436 method to prioritize strains for whole-genome sequencing [54]. On the other hand, the sequevar  
437 system appears to robustly reflect phylogenetic relationships for the diverse phylotype II strains. As  
438 more phylotype III and phylotype IV genomes become available, it will be useful to test whether the  
439 sequevar system works well in these phylotypes.

### 440 **3.7. Using LINs to circumscribe RSSC groups for easy genome-based identification**

441 In the LIN system, genomes are classified based on genome similarity without deciding on any *a*  
442 *priori* group boundaries. LINs can thus be used to circumscribe species complexes, species, or  
443 within-species groups and place any genome within these groups. If the breadth of a taxon is defined  
444 based on an ANI distance from the type strain, this can be done based on the LIN assigned to the type  
445 strain. For example, K60 is the type strain of *R. solanacearum*, and the LIN of K60 up to the F  
446 position (corresponding to 95% ANI) in the LINbase web server is 14<sub>A</sub>1<sub>B</sub>0<sub>C</sub>0<sub>D</sub>0<sub>E</sub>3<sub>F</sub>. Therefore, the  
447 LIN of the *R. solanacearum* species is 14<sub>A</sub>1<sub>B</sub>0<sub>C</sub>0<sub>D</sub>0<sub>E</sub>3<sub>F</sub>, and each genome that has the same LIN at  
448 these positions can be immediately identified as a member of the species *R. solanacearum*. As shown  
449 in Figure 6, the LIN for *R. pseudosolanacearum* is 14<sub>A</sub>1<sub>B</sub>0<sub>C</sub>0<sub>D</sub>0<sub>E</sub>0<sub>F</sub>, and the LIN for *R. syzygii* is  
450 14<sub>A</sub>1<sub>B</sub>0<sub>C</sub>0<sub>D</sub>0<sub>E</sub>2<sub>F</sub>.

451 If a type strain genome is not available for a group or a group does not have a predetermined ANI  
452 breadth (because it is not a species), the group can still be circumscribed based on the LIN positions  
453 shared by its members. Since we added the 100 RSSC genomes used in this study to the LINbase  
454 web server and assigned LINs to each of them, we were also able to circumscribe the RSSC and its  
455 phylotypes, sub phylotypes, and population clusters so that any newly sequenced genome can be  
456 identified not only as a member of a species but also as a member of any of these other groups. In  
457 Figure 6, we report the LINs corresponding to each of these groups. While the LINs assigned to each  
458 individual genome are not shown in the figure, they are stored in Table S1 and in LINbase and can be  
459 used to circumscribe even more highly resolved groups corresponding to individual genetic lineages  
460 within the RSSC. Whole genome-based LINs could thus be used to replace the single marker gene-  
461 based sequevar system, which we have shown to contradict core genome phylogeny for phylotype I.

#### 462 **4.0 Conclusion**

463 In conclusion, we have shown how a genomic meta-analysis can be used to classify the RSSC  
464 according to the evolutionary, biological, and ecological species concepts. We circumscribed validly  
465 published named species, phylotypes, clades within phylotypes, sequevars (when possible), and  
466 populations. We determined how extensively genes are shared within and between phylotypes and  
467 which genes most frequently recombine. We also provided the basis for further, more in depth,  
468 investigations of the RSSC. LINbase makes it straightforward to circumscribe any additional groups  
469 based on additional sampling and genome sequencing of the diversity within the RSSC and  
470 additional genomic comparisons and phenotypic tests. Any new isolate with a draft genome sequence  
471 can then be precisely identified as a member of any of these groups to help inform basic research,  
472 disease management, and biosecurity regulations.

#### 473 **Conflicts of interest**

474 Life Identification Number and LIN are registered trademarks of This Genomic Life, Inc. Lenwood  
475 S. Heath and Boris A. Vinatzer report in accordance with Virginia Tech policies and procedures and  
476 their ethical obligation as researchers, that they have a financial interest in the company This  
477 Genomic Life, Inc., that may be affected by the research reported in this manuscript. They have  
478 disclosed those interests fully to Virginia Tech, and they have in place an approved plan for  
479 managing any potential conflicts arising from this relationship.

480

### 481 **Funding information**

482 Funding to Boris A. Vinatzer, Caitilyn Allen, and Lenwood S. Heath was provided by USDA APHIS  
483 (contract AP19PPQS&T00C083). Funding to Boris A. Vinatzer and Lenwood S. Heath was also  
484 provided by NSF (DBI-2018522). Funding to Boris A. Vinatzer was also provided in part by the  
485 Virginia Agricultural Experiment Station and the Hatch Program of USDA NIFA. Caitilyn Allen was  
486 funded by U. Wisconsin-Madison College of Agricultural and Life Sciences. Tiffany M. Lowe-  
487 Power was funded by USDA NIFA (grant # 2022-67013-36272) and UC Davis College of  
488 Agricultural and Environmental Sciences and Department of Plant Pathology (laboratory start-up  
489 funds).

### 490 **Acknowledgements**

491 We thank our colleague Emmanuel Wicker (CIRAD, France) for providing reference egl sequences  
492 and Noah A. Kinscherf, Jessica L. Prom, and Alicia N. Truchon for genomic DNA extractions at  
493 UW-Madison. Additionally, we thank Stéphane Poussier (University of La Réunion) and Jonathan  
494 Jacobs (The Ohio State University) for helpful discussions about sequevar typing of phylotype I  
495 strains.

## 496 **References Cited**

- 497 1. **Konstantinidis KT, Ramette A, Tiedje JM.** The bacterial species definition in the genomic era.  
498 *Philos Trans R Soc Lond B Biol Sci* 2006;361:1929–1940.
- 499 2. **Lowe-Power TM, Khokhani D, Allen C.** How *Ralstonia solanacearum* Exploits and Thrives in the  
500 Flowing Plant Xylem Environment. *Trends Microbiol* 2018;26:929–942.
- 501 3. **Ailloud F, Lowe T, Cellier G, Roche D, Allen C, et al.** Comparative genomic analysis of *Ralstonia*  
502 *solanacearum* reveals candidate genes for host specificity. *BMC Genomics* 2015;16:270.
- 503 4. **Remenant B, Coupat-Goutaland B, Guidot A, Cellier G, Wicker E, et al.** Genomes of three tomato  
504 pathogens within the *Ralstonia solanacearum* species complex reveal significant evolutionary  
505 divergence. *BMC Genomics* 2010;11:379.
- 506 5. **Prior P, Ailloud F, Dalsing BL, Remenant B, Sanchez B, et al.** Genomic and proteomic evidence  
507 supporting the division of the plant pathogen *Ralstonia solanacearum* into three species. *BMC Genomics*  
508 2016;17:90.
- 509 6. **Poussier S, Prior P, Luisetti J, Hayward C, Fegan M.** Partial sequencing of the *hrpB* and  
510 endoglucanase genes confirms and expands the known diversity within the *Ralstonia solanacearum*  
511 species complex. *Syst Appl Microbiol* 2000;23:479–486.
- 512 7. **Safni I, Cleenwerck I, De Vos P, Fegan M, Sly L, et al.** Polyphasic taxonomic revision of the  
513 *Ralstonia solanacearum* species complex: proposal to emend the descriptions of *Ralstonia solanacearum*  
514 and *Ralstonia syzygii* and reclassify current *R. syzygii* strains as *Ralstonia syzygii* subsp. *syzygii* subsp.  
515 nov., *R. solanacearum* phylotype IV strains as *Ralstonia syzygii* subsp. *indonesiensis* subsp. nov., banana  
516 blood disease bacterium strains as *Ralstonia syzygii* subsp. *celebesensis* subsp. nov. and *R. solanacearum*  
517 phylotype I and III strains as *Ralstonia pseudosolanacearum* sp. nov. *Int J Syst Evol Microbiol*  
518 2014;64:3087–3103.

- 519 8. **Rosselló-Mora R, Amann R.** The species concept for prokaryotes. *FEMS Microbiol Rev* 2001;25:39–  
520 67.
- 521 9. **Stackebrandt E, Frederiksen W, Garrity GM, Grimont PAD, Kämpfer P, et al.** Report of the ad  
522 hoc committee for the re-evaluation of the species definition in bacteriology. *Int J Syst Evol Microbiol*  
523 2002;52:1043–1047.
- 524 10. **Hull DL.** The ideal species concept - and why we can't get it. In: Claridge MF, Dawah HA, Wilson  
525 MR (editors). *Species: The Units of Biodiversity*. London: Chapman and Hall; 1997. pp. 357–380.
- 526 11. **Stott CM, Bobay L-M.** Impact of homologous recombination on core genome phylogenies. *BMC*  
527 *Genomics* 2020;21:829.
- 528 12. **Parks DH, Chuvochina M, Chaumeil P-A, Rinke C, Mussig AJ, et al.** A complete domain-to-  
529 species taxonomy for Bacteria and Archaea. *Nat Biotechnol* 2020;38:1079–1086.
- 530 13. **Parks DH, Chuvochina M, Waite DW, Rinke C, Skarshewski A, et al.** A standardized bacterial  
531 taxonomy based on genome phylogeny substantially revises the tree of life. *Nat Biotechnol* 2018;36:996–  
532 1004.
- 533 14. **Schoch C.** *NCBI Taxonomy*. National Center for Biotechnology Information (US); 2020.
- 534 15. **Yilmaz P, Parfrey LW, Yarza P, Gerken J, Pruesse E, et al.** The SILVA and 'All-species Living  
535 Tree Project (LTP)' taxonomic frameworks. *Nucleic Acids Res* 2014;42:D643–8.
- 536 16. **Fegan M, Prior P, Others.** How complex is the *Ralstonia solanacearum* species complex. *Bacterial*  
537 *wilt disease and the Ralstonia solanacearum species complex* 2005;1:449–461.
- 538 17. **Andersson L.** The driving force: Species concepts and ecology. *Taxon* 1990;39:375–382.
- 539 18. **Vos M.** A species concept for bacteria based on adaptive divergence. *Trends Microbiol* 2011;19:1–7.
- 540 19. **Arevalo P, VanInsberghe D, Polz MF.** A Reverse Ecology Framework for Bacteria and Archaea. In:



- 541 Polz MF, Rajora OP (editors). *Population Genomics: Microorganisms*. Cham: Springer International  
542 Publishing; 2019. pp. 77–96.
- 543 20. **Arevalo P, VanInsberghe D, Elsherbini J, Gore J, Polz MF**. A Reverse Ecology Approach Based  
544 on a Biological Definition of Microbial Populations. *Cell* 2019;178:820–834.e14.
- 545 21. **Staley JT**. The bacterial species dilemma and the genomic-phylogenetic species concept. *Philos Trans*  
546 *R Soc Lond B Biol Sci* 2006;361:1899–1909.
- 547 22. **Bobay L-M, Ochman H**. Biological species are universal across Life’s domains. *Genome Biol Evol*.  
548 Epub ahead of print 10 February 2017. DOI: 10.1093/gbe/evx026.
- 549 23. **Dillon MM, Thakur S, Almeida RND, Wang PW, Weir BS, et al**. Recombination of ecologically  
550 and evolutionarily significant loci maintains genetic cohesion in the *Pseudomonas syringae* species  
551 complex. *Genome Biol* 2019;20:3.
- 552 24. **Young JM, Takikawa Y, Gardan L, Stead DE**. Changing Concepts in the Taxonomy of Plant  
553 Pathogenic Bacteria. *Annu Rev Phytopathol* 1992;30:67–105.
- 554 25. **Arnold DL, Lovell HC, Jackson RW, Mansfield JW**. *Pseudomonas syringae* pv. phaseolicola: from  
555 ‘has bean’ to supermodel. *Mol Plant Pathol* 2011;12:617–627.
- 556 26. **Cook D**. Genetic diversity of *Pseudomonas solanacearum*: Detection of restriction fragment length  
557 polymorphisms with DNA probes that specify virulence and the hypersensitive response. *Mol Plant*  
558 *Microbe Interact* 1989;2:113.
- 559 27. **Albuquerque GMR, Santos LA, Felix KCS, Rollemberg CL, Silva AMF, et al**. Moko Disease-  
560 Causing Strains of *Ralstonia solanacearum* from Brazil Extend Known Diversity in Paraphyletic  
561 Phylotype II. *Phytopathology* 2014;104:1175–1182.
- 562 28. **Xu J, Pan ZC, Prior P, Xu JS, Zhang Z, et al**. Genetic diversity of *Ralstonia solanacearum* strains  
563 from China. *Eur J Plant Pathol* 2009;125:641–653.

- 564 29. **Hayward AC**. Characteristics of *Pseudomonas solanacearum*. *J Appl Bacteriol* 1964;27:265–277.
- 565 30. **Vinatzer BA, Weisberg AJ, Monteil CL, Elmarakeby HA, Sheppard SK, et al**. A Proposal for a  
566 Genome Similarity-Based Taxonomy for Plant-Pathogenic Bacteria that Is Sufficiently Precise to Reflect  
567 Phylogeny, Host Range, and Outbreak Affiliation Applied to *Pseudomonas syringae* sensu lato as a Proof  
568 of Concept. *Phytopathology* 2017;107:18–28.
- 569 31. **Tian L, Huang C, Mazloom R, Heath LS, Vinatzer BA**. LINbase: a web server for genome-based  
570 identification of prokaryotes as members of crowdsourced taxa. *Nucleic Acids Res* 2020;48:W529–W537.
- 571 32. **Vallenet D, Engelen S, Mornico D, Cruveiller S, Fleury L, et al**. MicroScope: a platform for  
572 microbial genome annotation and comparative genomics. *Database* 2009;2009:bap021.
- 573 33. **Koren S, Walenz BP, Berlin K, Miller JR, Bergman NH, et al**. Canu: scalable and accurate long-  
574 read assembly via adaptive k-mer weighting and repeat separation. *Genome Res* 2017;27:722–736.
- 575 34. **Parks DH, Imelfort M, Skennerton CT, Hugenholtz P, Tyson GW**. CheckM: assessing the quality  
576 of microbial genomes recovered from isolates, single cells, and metagenomes. *Genome Res*  
577 2015;25:1043–1055.
- 578 35. **Tian L, Mazloom R, Heath LS, Vinatzer BA**. LINflow: a computational pipeline that combines an  
579 alignment-free with an alignment-based method to accelerate generation of similarity matrices for  
580 prokaryotic genomes. *PeerJ* 2021;9:e10906.
- 581 36. **Bayliss SC, Thorpe HA, Coyle NM, Sheppard SK, Feil EJ**. PIRATE: A fast and scalable  
582 pangenomics toolbox for clustering diverged orthologues in bacteria. *Gigascience*;8. Epub ahead of print  
583 1 October 2019. DOI: 10.1093/gigascience/giz119.
- 584 37. **Seemann T**. Prokka: rapid prokaryotic genome annotation. *Bioinformatics* 2014;30:2068–2069.
- 585 38. **Minh BQ, Schmidt HA, Chernomor O, Schrempf D, Woodhams MD, et al**. IQ-TREE 2: New  
586 Models and Efficient Methods for Phylogenetic Inference in the Genomic Era. *Mol Biol Evol*

- 587 2020;37:1530–1534.
- 588 39. **Yu G, Smith DK, Zhu H, Guan Y, Lam TT-Y.** Ggtree : An r package for visualization and  
589 annotation of phylogenetic trees with their covariates and other associated data. *Methods Ecol Evol*  
590 2017;8:28–36.
- 591 40. **Conway JR, Lex A, Gehlenborg N.** UpSetR: an R package for the visualization of intersecting sets  
592 and their properties. *Bioinformatics* 2017;33:2938–2940.
- 593 41. **Pritchard L, Glover RH, Humphris S, Elphinstone JG, Toth IK.** Genomics and taxonomy in  
594 diagnostics for food security: soft-rotting enterobacterial plant pathogens. *Anal Methods* 2015;8:12–24.
- 595 42. **Warnes GR, Bolker B, Bonebakker L, Gentleman R, Liaw WHA, et al.** gplots: various R  
596 programming tools for plotting data. R package version 2.17. 0. *Computer software*.
- 597 43. **Didelot X, Wilson DJ.** ClonalFrameML: efficient inference of recombination in whole bacterial  
598 genomes. *PLoS Comput Biol* 2015;11:e1004041.
- 599 44. **Danecek P, Bonfield JK, Liddle J, Marshall J, Ohan V, et al.** Twelve years of SAMtools and  
600 BCFtools. *Gigascience*;10. Epub ahead of print 16 February 2021. DOI: 10.1093/gigascience/giab008.
- 601 45. **Kwong J.** *cfml-maskrc: Masks recombinant regions in an alignment based on ClonalFrameML*  
602 *output*. <https://github.com/kwongj/cfml-maskrc> (accessed October 2021).
- 603 46. **Kozlov AM, Darriba D, Flouri T, Morel B, Stamatakis A.** RAxML-NG: a fast, scalable and user-  
604 friendly tool for maximum likelihood phylogenetic inference. *Bioinformatics* 2019;35:4453–4455.
- 605 47. **Seemann T.** *snippy: Rapid haploid variant calling and core genome alignment*.  
606 <https://github.com/tseemann/snippy> (accessed October 2021).
- 607 48. **Croucher NJ, Page AJ, Connor TR, Delaney AJ, Keane JA, et al.** Rapid phylogenetic analysis of  
608 large samples of recombinant bacterial whole genome sequences using Gubbins. *Nucleic Acids Res*

- 609 2015;43:e15.
- 610 49. **Wicker E, N'guessan C, Le Roux-Nio AC, Deberdt P, Sujeeun L, et al.** A reference database of  
611 *Ralstonia solanacearum* egl-mutS haplotypes for global epidemiological surveillance of bacterial wilts.  
612 [https://agritrop.cirad.fr/582579/1/Wicker\\_BD%20egl-mutS\\_FINAL.pdf](https://agritrop.cirad.fr/582579/1/Wicker_BD%20egl-mutS_FINAL.pdf).
- 613 50. **Camacho C, Coulouris G, Avagyan V, Ma N, Papadopoulos J, et al.** BLAST+: architecture and  
614 applications. *BMC Bioinformatics* 2009;10:421.
- 615 51. **Albuquerque GMR, Souza EB, Silva AMF, Lopes CA, Boiteux LS, et al.** Genome Sequence of  
616 *Ralstonia pseudosolanacearum* Strains with Compatible and Incompatible Interactions with the Major  
617 Tomato Resistance Source Hawaii 7996. *Genome Announc*;5. Epub ahead of print 7 September 2017.  
618 DOI: 10.1128/genomeA.00982-17.
- 619 52. **Wicker E, Lefeuvre P, de Cambiaire J-C, Lemaire C, Poussier S, et al.** Contrasting recombination  
620 patterns and demographic histories of the plant pathogen *Ralstonia solanacearum* inferred from MLSA.  
621 *ISME J* 2012;6:961–974.
- 622 53. **Hong JC, Norman DJ, Reed DL, Momol MT, Jones JB.** Diversity among *Ralstonia solanacearum*  
623 strains isolated from the southeastern United States. *Phytopathology* 2012;102:924–936.
- 624 54. **Etminani F, Yousefvand M, Harighi B.** Phylogenetic analysis and molecular signatures specific to  
625 the *Ralstonia solanacearum* species complex. *Eur J Plant Pathol* 2020;158:261–279.
- 626 55. **Safni I, Subandiyah S, Fegan M.** Ecology, Epidemiology and Disease Management of *Ralstonia*  
627 *syzygii* in Indonesia. *Front Microbiol* 2018;9:419.
- 628 56. **Coupat B, Chaumeille-Dole F, Fall S, Prior P, Simonet P, et al.** Natural transformation in the  
629 *Ralstonia solanacearum* species complex: number and size of DNA that can be transferred. *FEMS*  
630 *Microbiol Ecol* 2008;66:14–24.
- 631 57. **Guinard J, Latreille A, Guérin F, Poussier S, Wicker E.** New Multilocus Variable-Number

632 Tandem-Repeat Analysis (MLVA) Scheme for Fine-Scale Monitoring and Microevolution-Related Study  
633 of *Ralstonia pseudosolanacearum* Phylotype I Populations. *Appl Environ Microbiol*;83. Epub ahead of  
634 print 1 March 2017. DOI: 10.1128/AEM.03095-16.

635 58.**Guidot A, Coupat B, Fall S, Prior P, Bertolla F.** Horizontal gene transfer between *Ralstonia*  
636 *solanacearum* strains detected by comparative genomic hybridization on microarrays. *ISME J*  
637 2009;3:549–562.

638 59.**Prokchorchik M, Pandey A, Moon H, Kim W, Jeon H, et al.** Host adaptation and microbial  
639 competition drive *Ralstonia solanacearum* phylotype I evolution in the Republic of Korea. *Microb*  
640 *Genom*;6. Epub ahead of print November 2020. DOI: 10.1099/mgen.0.000461.

641 60.**Sabbagh CRR, Carrere S, Lonjon F, Vailliau F, Macho AP, et al.** Pangenomic type III effector  
642 database of the plant pathogenic *Ralstonia spp.* *PeerJ* 2019;7:e7346.

643 61.**Gluck-Thaler E, Cerutti A, Perez-Quintero AL, Butchacas J, Roman-Reyna V, et al.** Repeated  
644 gain and loss of a single gene modulates the evolution of vascular plant pathogen lifestyles. *Sci Adv*;6.  
645 Epub ahead of print November 2020. DOI: 10.1126/sciadv.abc4516.

646 62.**Spraker JE, Sanchez LM, Lowe TM, Dorrestein PC, Keller NP.** *Ralstonia solanacearum*  
647 lipopeptide induces chlamyospore development in fungi and facilitates bacterial entry into fungal  
648 tissues. *ISME J* 2016;10:2317–2330.

649 63.**Bernal P, Llamas MA, Filloux A.** Type VI secretion systems in plant-associated bacteria. *Environ*  
650 *Microbiol* 2018;20:1–15.

651 64.**Lowe-Power T, Avalos J, Munoz MC, Chipman K.** A Meta-analysis of the known Global  
652 Distribution and Host Range of the *Ralstonia* Species Complex. *bioRxiv* 2021;2020.07.13.189936.

653

654

655 **Figure legends**

656

657 **Figure 1. Major taxonomic revisions for the *Ralstonia solanacearum* species complex (RSSC).**

658 The bottom half depicts the timeline when these major changes were introduced, and the top half  
659 illustrates the predominant taxonomy used for each era. For each revision, pink boxes highlight  
660 changes to the classification, and blue boxes show levels that were unchanged. Taxonomic  
661 classification proposed through this paper is highlighted in grey color.

662 **Figure 2. Core genome analysis for the representative genomes of RSSC. (A)** Selection of the

663 representative genomes. Purple boxes indicate the software used, and the grey boxes show the  
664 number of genomes left at each step. (B) The number of genomes that carry each gene in the  
665 pangenome. (C) Phylogenetic tree obtained with the core-genome analysis. All clades with high  
666 bootstrap values are included in the tree. Phylotypes of the strains are highlighted in different colors  
667 representing phylotypes I, IIA, IIB, III, IV. Based on the analysis, strains P822, K60, UW700 are  
668 classified as phylotype IIC. Colored dots at the node of each strain represent the region of isolation.

669 **Figure 3. Pangenome analysis represented using an Upset plot to highlight how many genes are**

670 **shared between phylotypes I, II, III, and IV.** Each bar on the vertical bar chart represents the  
671 number of genes shared by the combination of phylotypes shown below the chart. The horizontal bar  
672 chart indicates the size of the phylotype-core genomes.

673 **Figure 4. Average nucleotide identity (ANI) analysis for representative RSSC genomes. (A)**

674 Heatmap of pairwise ANI values for all genomes. (B) Histogram of pairwise ANI values among all  
675 paired genome combinations. (C) Pair-wise ANI distribution within each phylotype. Grey dots  
676 represent pairwise ANI between genomes belonging to the same phylotype, and red dots show the  
677 mean ANI for each phylotype.

678 **Figure 5. Comparison of core-genome tree, recombination-free tree, population clusters,**  
679 **sequevar types, and delineation of RSSC groups using LINs.** The tree on the left is a vertical  
680 version of the core-genome phylogenetic tree from Figure 2. To the right of each strain name,  
681 assignments to population clusters, sequevars, and then the respective hosts of isolation. LINs  
682 corresponding to each group (the RSSC, named species, phylotypes, sub-phylotypes, and population  
683 clusters) are listed using colors matching each group. Newly sequenced genomes can be identified as  
684 members of these groups at [www.linbase.org](http://www.linbase.org). A flipped recombination-free tree is depicted on the  
685 right.

686 **Figure 6. Comparison of estimated recombination for representative RSSC genomes from each**  
687 **phylotype.** Genes with putative recombination events were identified using Gubbins [48]. (A) The  
688 number of recombination events for each genome, normalized by the number of genomes of each  
689 phylotype in the genome set. (B) The number of recombination events on the chromosome vs.  
690 megaplasmid, normalized by the length of the replicon. (C) Estimated number of recombination  
691 events detected for each gene (dots). (D) Comparison of the number of recombination events for the  
692 sequevar marker gene (*egl*) vs. the total recombination events for each genome.

693

694

695

696

697

698

699 **Figure 1. Major taxonomic revisions for the *Ralstonia solanacearum* species complex (RSSC).**

700 The bottom half depicts the timeline when these major changes were introduced, and the top half  
 701 illustrates the predominant taxonomy used for each era. For each revision, pink boxes highlight  
 702 changes to the classification, and blue boxes show levels that were unchanged. Taxonomic  
 703 classification proposed through this paper is highlighted in grey color.

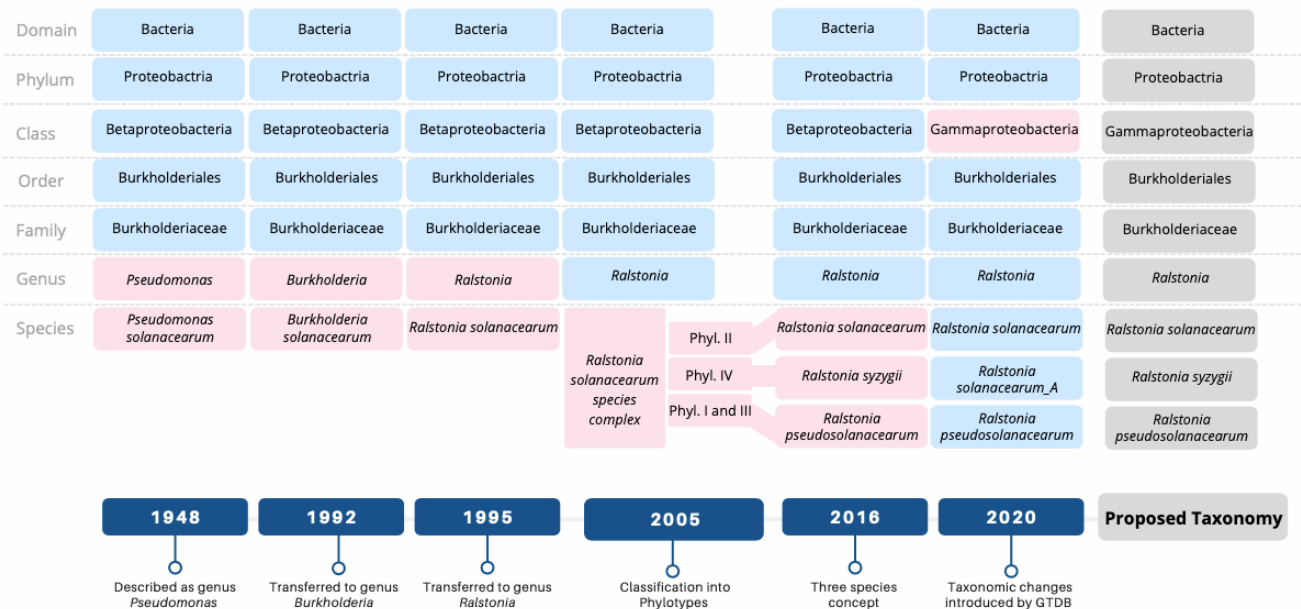

706 **Figure 2. Core genome analysis for the representative genomes of RSSC. (A) Selection of the**

707 representative genomes. Purple boxes indicate the software used, and the grey boxes show the

708 number of genomes left at each step. (B) The number of genomes that carry each gene in the

709 pangenome. (C) Phylogenetic tree obtained with the core-genome analysis. All clades with high

710 bootstrap values are included in the tree. Phylotypes of the strains are highlighted in different colors

711 representing phylotypes I, IIA, IIB, III, IV. Based on the analysis, strains P822, K60, UW700 are

712 classified as phylotype IIC. Colored dots at the node of each strain represent the region of isolation.



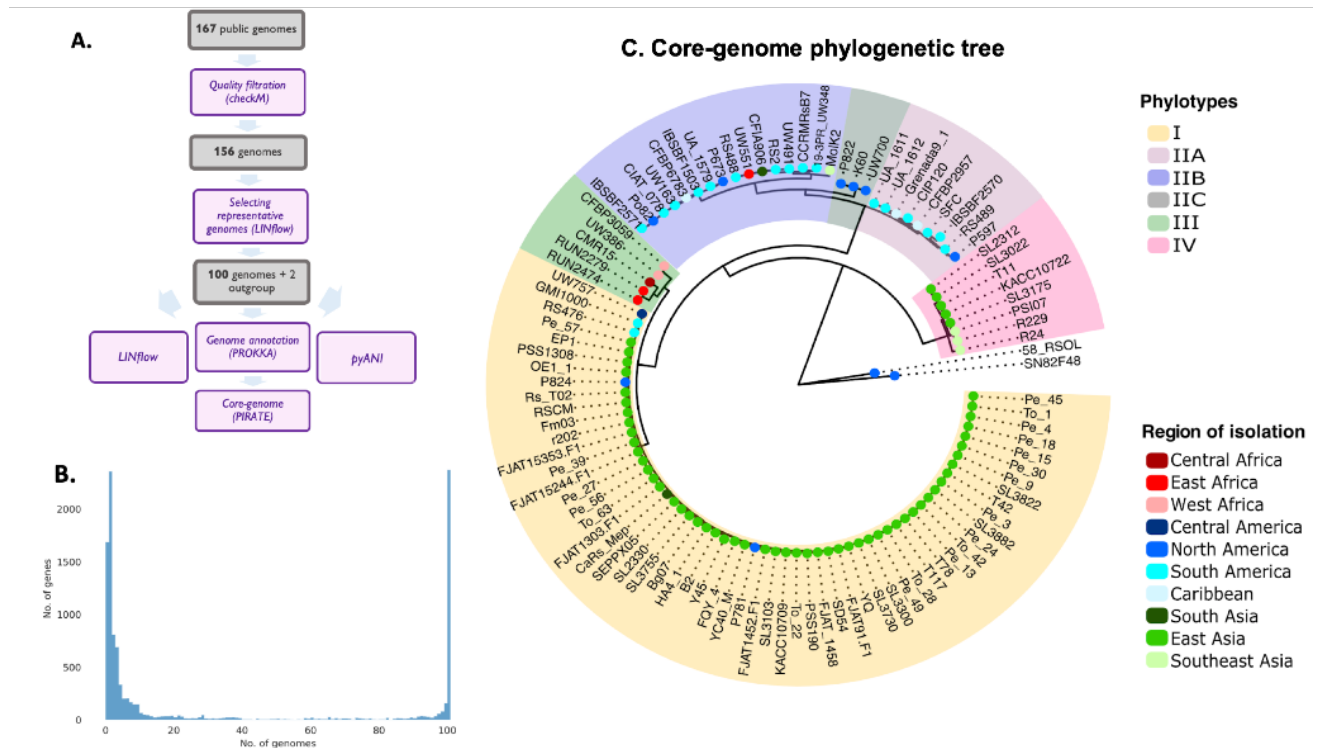

713

714 **Figure 3. Pangenome analysis represented using an Upset plot to highlight how many genes are**  
 715 **shared between phylotypes I, II, III, and IV.** Each bar on the vertical bar chart represents the  
 716 number of genes shared by the combination of phylotypes shown below the chart. The horizontal bar  
 717 chart indicates the size of the phylotype-core genomes.

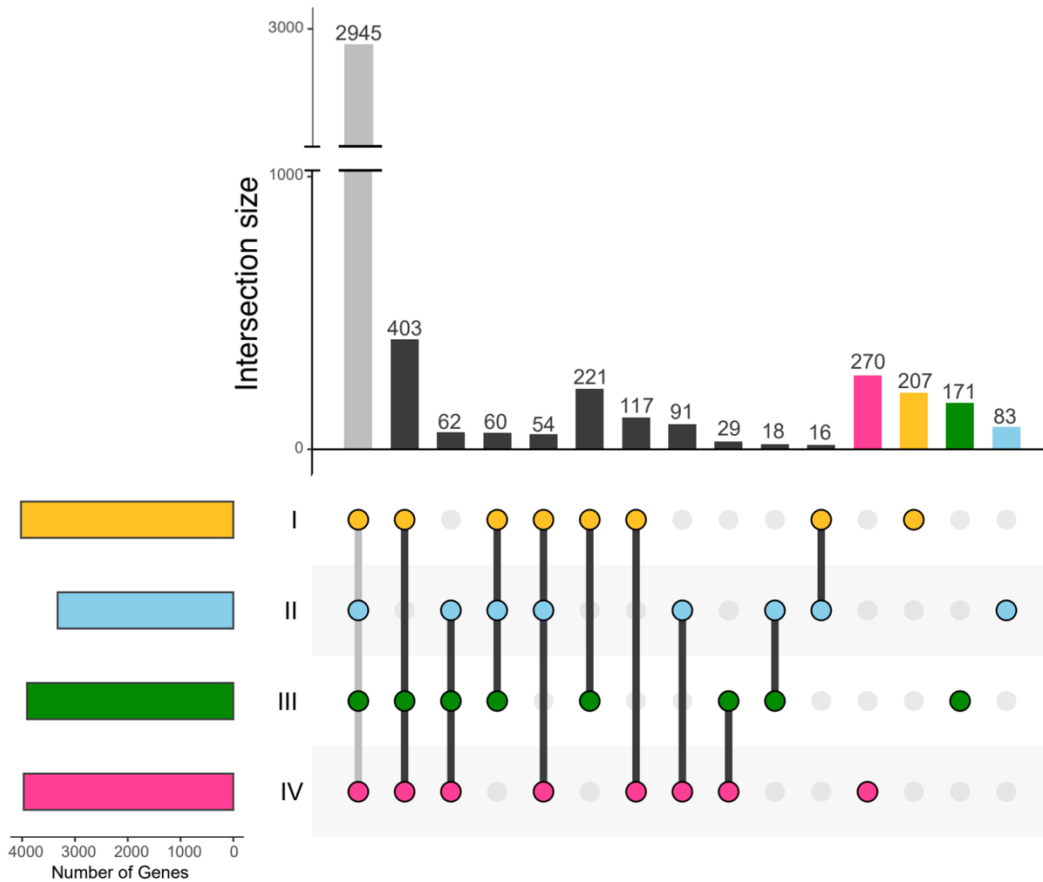

718

719

720 **Figure 4. Average nucleotide identity (ANI) analysis for representative RSSC genomes. (A)**

721 Heatmap of pairwise ANI values for all genomes. (B) Histogram of pairwise ANI values among all

722 paired genome combinations. (C) Pair-wise ANI distribution within each phylotype. Grey dots

723 represent pairwise ANI between genomes belonging to the same phylotype, and red dots show the

724 mean ANI for each phylotype.

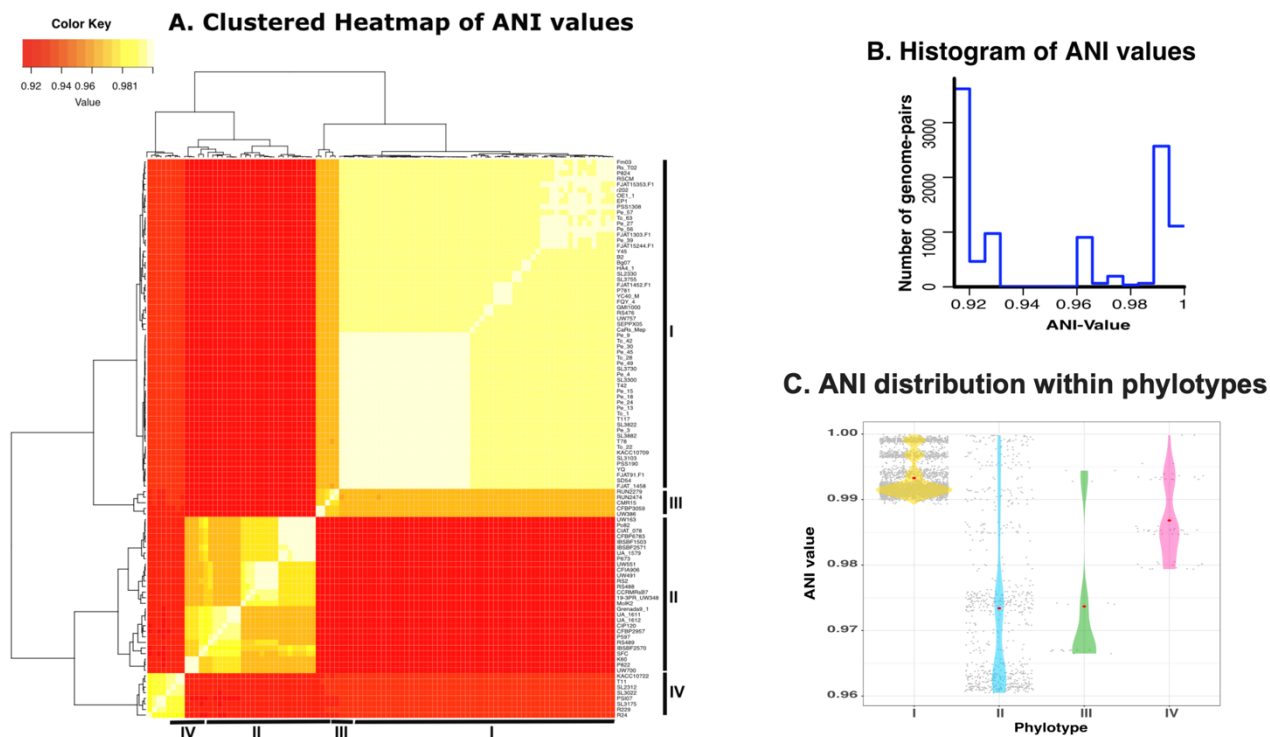

725

726

727 **Figure 5. Comparison of core-genome tree, recombination-free tree, population clusters,**  
728 **sequevar types, and delineation of RSSC groups using LINs.** The tree on the left is a vertical  
729 version of the core-genome phylogenetic tree from Figure 2. To the right of each strain name,  
730 assignments to population clusters, sequevars, and then the respective hosts of isolation. LINs  
731 corresponding to each group (the RSSC, named species, phylotypes, sub-phylotypes, and population  
732 clusters) are listed using colors matching each group. Newly sequenced genomes can be identified as  
733 members of these groups at [www.linbase.org](http://www.linbase.org). A flipped recombination-free tree is depicted on the  
734 right.

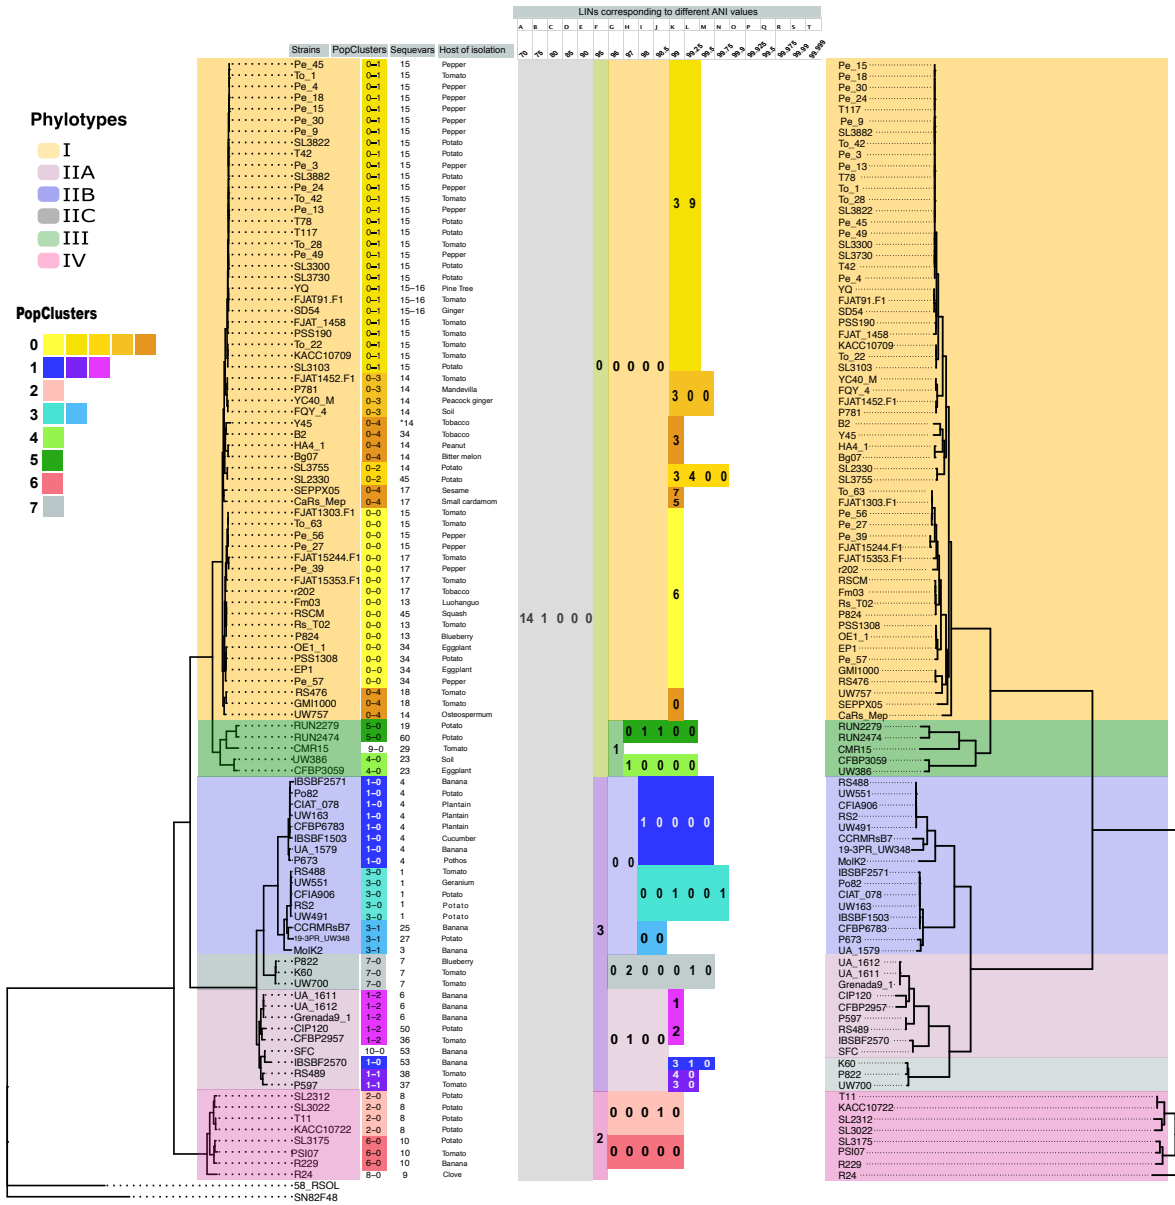

735

736 **Figure 6. Comparison of estimated recombination for representative RSSC genomes from each**  
 737 **phylotype. Genes with putative recombination events were identified using Gubbins [48]. (A) The**

738 number of recombination events for each genome, normalized by the number of genomes of each  
 739 phylotype in the genome set. (B) The number of recombination events on the chromosome vs.  
 740 megaplasmid, normalized by the length of the replicon. (C) Estimated number of recombination  
 741 events detected for each gene (dots). (D) Comparison of the number of recombination events for the  
 742 sequevar marker gene (*egl*) vs. the total recombination events for each genome.

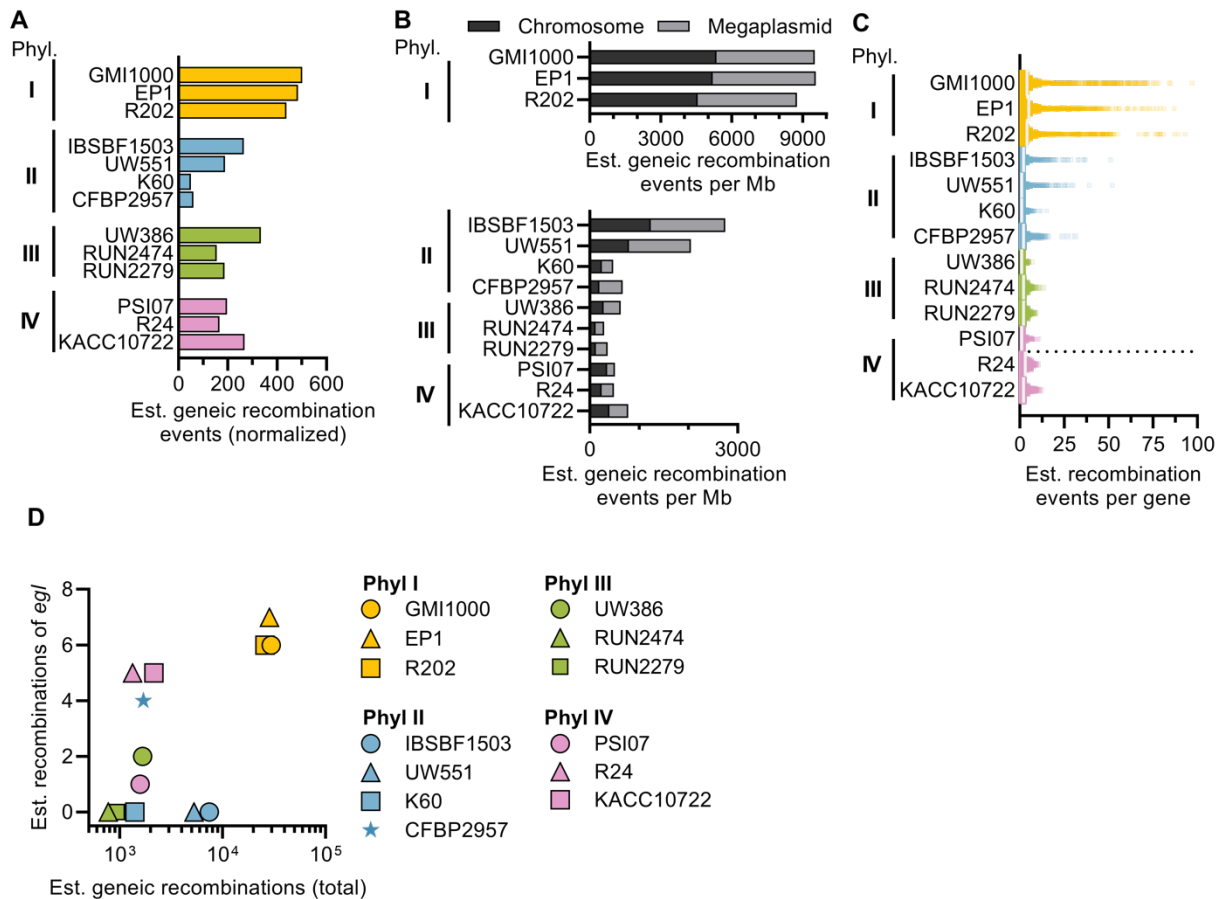

743
